# Supplementary material for: Use of the emergency department by refugees under the Interim Federal Health Program: A health records review
Source: PLoS One. 2018 May 10;13(5):e0197282. doi: 10.1371/journal.pone.0197282 (PMC5945039; doi:10.1371/journal.pone.0197282)
Supplement: S1 Dataset — (XLSX) [file pone.0197282.s001.xlsx]

## Sheet: Pre 2012
Patient	Repeat?	Pt with multiple visits?	FF?	Male	Female	Age	CPC	CTAS Score	Discharge Dx: Chronic	Discharge Dx: Acute Minor	Discharge Dx: Acute Major	Discharge Dx	Discharge Dx Category	Disposition: Home	Disposition: Admission	Prescription?	GP?	Told to FU GP?	Claim: Accepted	Claim: Rejected	Accepted Amount	Rejected Amount	Rejected - Paid?	Status		Claim 2: Rejected	Rejected Amount 2	Rejected - Paid? 2	Status 2	TOTAL COSTS
1	0	1		1		35	UEI	2		1		Humerus #	MSK - # - Extremity	1		1			1		117.97
2	1			1		35	UEP	2		1		Humerus #	MSK - # - Extremity	1		1			1		37.2
6	0	1			1	32	UEI	4	1			Non-union #	MSK - # - Extremity	1			1		1		46.3
7	1				1	32	UEP	5	1			Chronic PAIN issues	PAIN NYD - Chronic	1			1		1		56.4
10					1	20	SOB	3		1		COU	URT - Acute - Minor	1		1	1		1		35.3
11				1		44	HEM	3		1		Bronchitis	LRT - Acute - Bronchitis	1			1	1	1		35.3
12	0	1			1	48	AP	3	1			Fibroids	GYNE - Chronic - Fibroids	1		1			1		52.2
13	1				1	48	AP	3	1			Endometrio. vs pelv. PAIN NYD	GYNE - Chronic - Fibroids	1		1			1		37.2
15					1	54	CP - NC	3	1			Nonspecific CP	CP NYD	1				1	1		42.4
18					1	31	F	4		1		Pneumonia	LRT - Acute - PNA	1		1			1		42.4
19					1	63	CP	2		1		CP NYD	CP NYD	1		1			1		37.2
20				1		25	LEP	3		1		L lateral epicondylitis	MSK - STI	1					1		63.3
21					1	17	LAC	2		1		Chin laceration	TRAUMA - Lac	1			1		1		71.55
22				1		41	AP	3		1		Renal colic	RENAL - Acute - Colic	1		1	?		1		73.9
23					1	63	SOB	4		1		URTI NYD	URT - Acute - Minor	1		1			not billed (unknown)
24					1	30	UEP	5	1			R elbow #, pregnancy	MSK - # - Extremity	1					1		56.95
27					1	36	HI	4		1		HI	TRAUMA - Head - Minor	1					1		128.7
31	0	1			1	36	PREG	2		1		Fibroid/uterine ligament stretch (preg)	GYNE - Chronic - Fibroids	1					1		42.4
31A 12/6/17	1				1	36	HA	2		1		Migraine	HA - Benign	1					1		73.9
32					1	27	HA	2		1		HA	HA - Benign	1					1		74.42
33					1	39	?SAH	3		1		Migraine	HA - Benign	1					not billed (direct)
34	0	1			1	53	AP	2		1		?diverticulitis	GI - Minor - Diverticulitis	1		1			1		55.9
35	1				1	53	CP	2		1		GERD	GI - Minor - GERD	1		1				1		92.14	1							92.14
35A 12/6/21	1				1	54	RPP	3		1		Hemorrhoids, URTI	GI - Minor - GERD	1					1		37.2
36					1	39	LEP	3		1		Joint swelling NYD	MSK - STI	1					1		42.4
36A 12/5/17					1	39	UEI	3		1		?synovitis	MSK - STI	1		1			1		42.4
37					1	25	AP	3		1		Abdo PAIN	ABDO PAIN NYD	1		1			1		88.9
39				1		42	AP	3		1		Weakness NYD	WEAKNESS NYD	1			1		1		37.2
40	0	1			1	45	AP	4	1			Fibroids, pelvic PAIN	GYNE - Chronic - Fibroids	1			1		1		37.2
40A 11/2/26	1				1	45	AP	3	1			Chronic pelvic PAIN	PAIN NYD - Chronic	1					1		73.9
43				1		19	NV	3		1		Viral URTI	URT - Acute - Minor	1				1	1		42
44				1		22	AP	2		1		Renal colic	RENAL - Acute - Colic	1		1				1		70.25	1			1	1259.85	1		1330.1
45					1	25	AP	3	1			AP	ABDO PAIN NYD	1			1	1	1		73.9
46					1	87	HA	3		1		Bronchitis	LRT - Acute - Bronchitis	1		1	1		1		52.2
52					1	45	DV	3		1		Peripheral vertigo	Vertigo - Peripheral	1			1		1		63.3
53				1		72	UEI	3		1		Colles' fracture	MSK - # - Extremity	1		1	1		1		56.4
54	0	1	1	1		48	DV	3	1			HTN, ?neuropathic PAIN R arm	HTN - Chronic	1		1			1		46.3
55	1			1		48	DV	2	1			HTN, R shoulder impingement	HTN - Chronic	1		1			1		46.3
55A 11/3/11	1			1		48	UEI	NA	1			Chronic HTN	HTN - Chronic	1					1		35.3
55B 11/4/15	1			1		48	UEI	3	1			Rotator cuff injury	MSK - STI	1		1			1		35.3
55C 11/4/29	1			1		48	HTN	2	1			HTN	HTN - Chronic	1		1			1		55.9
56	1			1		48	ALOC	2			1	HTN encephalopathy	HTN - Acute		1	NA			1		63.3
57	1			1		48	NC	3			1	Carotid stenosis	NEURO - Acute - CVA		1	NA			not billed
57A 11/08/01	1			1		48	POC	5		1		Staple removal	Minor NOS	1			1		1		25.5
57B 12/01/19	1			1		48	sCVA	3		1		R arm concerns	MSK - STI	1					1		35.65
61	0	1	1		1	35	SOB	2		1		R small pneumothorax	LRT - Acute - PTX	1			1	1	1		42
61A 11/2/18	1				1	35	AP	3		1		?dyspepsia	GI - Minor - GERD	1		1	1	1	1		46.3
61B 11/3/2	1				1	35	AP	3		1		Abdo PAIN NYD	ABDO PAIN NYD	1			1	1	1		37.2
61C 11/3/4	1				1	35	AP	3		1		Abdo PAIN NYD	ABDO PAIN NYD	1			1	1	1		73.9
62	1				1	35	SOB	4		1		Malaise NYD	WEAKNESS NYD	1			1	1	1		63.3
63				1		37	FP	2			1	Right pyonephrosis	RENAL - Acute - Infxn		1	NA	1		1		88.8
65	0	1	1	1		58	LEP	4		1		Gout	MSK - STI	1			1		1		35.3
65A 11/6/14	1			1		58	LEP	3		1		Gout, osteochondroma	MSK - STI	1		1	1	1	1		65.3
65B 11/10/5	1			1		58	UEI	3		1		Wrist soft tissue ?	MSK - STI	1			1		1		59.75
66	1			1		58	F	3		1		Bronchitis	LRT - Acute - Bronchitis	1		1	1	1	1		37.2
66A 12/6/2	1			1		59	R	4	1			Razor BR	DERM - Minor	1			1	1	1		56.95
67					1	30	CP - NC	3		1		Soft tissue injuries	MSK - STI	1			1	1	1		46.3
70				1		23	SZ	3			1	Brain lesion NYD, lower leg cellulitis	ONC - New dx		1	NA	1		1		88.8
71					1	23	SZ	2			1	?first SZ	NEURO - Acute - Sz		1	NA				1		402.19	0	Collections, bad debt		1	1940.3	0	Collections	2342.49
72	0	1			1	65	CP - NC	2			1	NSTEMI	CARDIO - Acute - ACS		1	NA			1		52.2
72A 11/10/21	1				1	65	CP	3			1	NSTEMI	CARDIO - Acute - ACS		1	NA				1		169.46	0	Collections, bad debt						169.46
73	0	1			1	20	AP	3		1		?ruptured ovarian cyst	GYNE - Acute - Cyst	1		1	1		1		73.9
73A 11/3/13	1				1	20	BR	4		1		Partial thickness BR	TRAUMA - Burn - Minor	1		1	1	1		1		112.24	0	Collections, bad debt		1	370	0	Collections	482.24
74				1		37	CP	2			1	Rhabdomyolysis NYD	MSK - Rhabdo		1	NA			1		74.25
76					1	45	SOB	2		1		Viral URTI	URT - Acute - Minor	1					1		37.2
77				1		46	DEV	2			1	Pacemaker lead fracture	Medical device		1	NA	1		not billed
80	0	1			1	54	LEI	4		1		Soft tissue injury left ankle	MSK - STI	1					1		35.3
80A 11/6/6	1				1	54	FU	3		1		Ankle fracture	MSK - # - Extremity	1					1		103.05
80B 11/7/30	1				1	54	DV	3		1		Vertigo	Vertigo - NYD	1		1			1		56.4
80B 11/8/2	1				1	54	NV	3		1		Dehydration	Dehydration	1					1		37.2
84	0	1			1	35	BP	2		1		Mechanical BP	BACK PAIN - Mechanical	1		1			1		35.65
84A 11/10/26	1				1	35	LAC	4		1		Laceration digit	TRAUMA - Lac	1					1		45.65
85	0	1			1	49	AP	3	1			Chronic abdo PAIN NYD	ABDO PAIN NYD - Chronic	1					1		37.2
85A 11/01/04	1				1	49	AP	4	1			Perineal ulcer	DERM - Minor	1					1		35.3
85B 11/5/25	1				1	49	AP	4		1		Abdo PAIN NYD	ABDO PAIN NYD	1					1		35.3
86	0	1			1	37	UEP	3		1		MSK PAIN	PAIN NYD - Acute	1		1		1	1		42
86A 11/7/15	1				1	37	SYN	4		1		Vasovagal SYN	SYNCOPE - Benign	1					1		37.2
87				1		55	AP	3	1			GERD	GI - Minor - GERD	1		1		1		1		147.07	0	Collections, bad debt						147.07
89					1	37	AP	3		1		Symptoms NYD	Minor NOS	1			1		1		76.1
90	0	1		1		44	PAL	2			1	Pulmonary tuberculosis	LRT - Acute - TB		1				1		112.25
91	1			1		44	CP	2			1	Delirium	CONFUSION NYD		1				1		63.3
92	1			1		44	SOB	3				Left without tx	LWBS						1		42
93	1			1		45	HIC	4		1		Hiccups	Minor NOS	1					1		42
94					1	25	LEI	5		1		Soft tissue injuries	MSK - STI	1					1		35.65
98				1		22	F	2		1		Viral illness	URT - Acute - Minor	1					1		73.9
100	0	1		1		31	LEI	4	1			Post tibia fracture	MSK - # - Extremity	1					1		35.3
100A 11/2/15	1			1		31	LEP	4	1			Foot PAIN NYD	PAIN NYD - Acute	1		1			1		35.3
102	0	1			1	68	SOB	2			1	Adrenal insufficiency	ENDO - Acute		1				1		37.2
102A 11/8/25	1				1	68	GW	3			1	Adrenal insufficiency	ENDO - Acute		1				1		103.7
103	1				1	68	SOB	3			1	Pneumonia	LRT - Acute - PNA	1		1	1	1	1		85.15
103A 12/5/12	1				1	69	NV	3			1	Pneumonia	LRT - Acute - PNA		1		1		1		56.95
104	0	1			1	61	CP	2		1		Chest wall PAIN	CP NYD	1		1	1	1	1		97.6
105	1				1	61	LAB	3		1		RO endocarditis	CARDIO - Acute - Infxn	1			1		1		52.2
105A 11/11/25	1				1	61	LAB	3		1		RO endocarditis	CARDIO - Acute - Infxn	1			1		1		42.4
109	0	1		1		43	AP	3		1		Chest wall PAIN	CP NYD	1				1	1		42.4
109A 11/01/15	1			1		42	GLUC	3		1		Bell's palsy	NEURO - Acute - Minor	1		1			1		97.6
109A 11/01/24	1			1		42	sCVA	3		1		Bell's palsy	NEURO - Acute - Minor	1					1		35.3
110A 12/4/10	0	1			1	42	PAL	2		1		PAL NYD	CARDIO - Acute - Palp	1				1	1		46.3
110B 12/5/30	1				1	43	SYN	3	1			PAL NYD	CARDIO - Acute - Palp	1				1	1		37.2
112				1		62	LEI	4		1		Sprain left knee	MSK - STI	1					1		37.2
113				1		27	LAC	4		1		Laceration	TRAUMA - Lac	1		1			1		118.3
114				1		28	pTRA	2			1	Gunshot wound R thigh	TRAUMA - Penetrating - Major	1		1	1		1		202.1
115					1	84	AP	2			1	Cholecystitis	GI - Major - Cholecystitis		1				not billed
118	0	1			1	26	FU	4		1		Thyroid nodule, shoulder PAIN NYD	ENDO - Chronic	1		1			1		55.9
118A 11/2/12	1				1	26	LBC	3		1		Neck swelling	PAIN NYD - Acute	1					1		65.3
119				1		33	AP	3			1	Appendicitis	GI - Major - Appendicitis		1				not billed (self pay)
120A 12/4/15	0	1			1	31	GW	3	1			Menorrhagia	GYNE - Acute - Bleed	1					1		56.95
120B 12/4/17	1				1	31	FU	4	1			Dysfunctional uterine bleeding	GYNE - Chronic - DUB	1					1		35.65
121	0	1			1	52	LAC	3		1		Fingertip avulsion	TRAUMA - Lac	1					1		76.95
121A 12/4/17	1				1	52	FU	5		1		Fingertip avulsion	TRAUMA - Lac	1					1		15
122				1		24	CONS	3		1		CONS	GI - Minor - Constipation	1				1	1		46.3
123				1		42	AP	2		1		Diverticulitis	GI - Minor - Diverticulitis	1		1	1	1	1		42.4
124	0	1		1		35	BP	3			1	Lumbar compression #	MSK - # - Spine	1					not billed
125	1			1		34	BP	3			1	Lumbar compression #	MSK - # - Spine	1		1			1		56.95
126				1		46	LEI	4			1	RO DVT	THROMBOSIS - DVT	1					1		46.3
132	0	1			1	45	CP	2		1		MSK CP	CP NYD	1			1	1	1		46.3
132A 12/5/22	1				1	45	DV	3		1		Anxiety	PSYCH - Minor - Anxiety	1			1		1		42.4
132B 11/3/15	1				1	44	DPG	4			1	Esophageal stricture	GI - Major - Esophageal stricture	1			1		1		42
133	0	1		1		24	LAC	3		1		Finger laceration	TRAUMA - Lac	1					1		148.7
133A 11/4/13	1			1		24	LAC	5		1		Finger laceration	TRAUMA - Lac	1					1		18.7
134	1			1		25	LAC	4		1		Finger laceration	TRAUMA - Lac	1					1		69.95
134A 12/3/15	1			1		25	AP	4		1		Gastritis	GI - Minor - GERD	1		1			1		73.9
137				1		44	HA	3		1		HA	HA - Benign	1		1		1	1		123.5
140					1	38	AP	3		1		GERD	GI - Minor - GERD	1		1			1		103.7
142				1		25	HA	3		1		HA	HA - Benign	1					1		42
143				1		32	LAC	2		1		Fingertip avulsion	TRAUMA - Lac	1					1		35.3
145				1		32	COLD	5			1	Severe frostbite	ENVIRO - Major	1		1			1		107.4
147				1		49	GW	3		1		Pneumonia	LRT - Acute - PNA	1		1			1		35.65
148	0	1	1	1		54	GW	3		1		Fatigue NYD	WEAKNESS NYD	1			1	1	1		63.3
148A 11/6/12	1			1		54	NV	3		1		DIA NYD	GI - Minor - Gastro	1			1	1		1		125.97	0	Collections, bad debt						125.97
148B 11/6/8	1			1		54	NV	3		1		Nausea NYD	NV - NYD	1		1	1		1		46.3
149	1			1		54	NV	3		1		Abdo PAIN NYD	ABDO PAIN NYD	1		1	1	1	1		35.3
150	1			1		54	AP	3		1		Abdo PAIN NYD	ABDO PAIN NYD	1					1		63.3
151	0	1	1	1		40	LEP	4	1			Infrapatellar bursitis	MSK - STI	1					1		55.55
151A 12/3/19	1			1		40	LEP	3	1			Pre-tibial bursitis	MSK - STI	1					1		42.4
151B 12/3/16	1			1		40	LEP	4	1			Bursitis	MSK - STI	1		1			1		42.4
151C 11/10/21	1			1		40	FU	5		1		?passed stone	RENAL - Acute - Colic	1					1		35.65
151D 11/9/30	1			1		39	FP	2		1		FP NYD	PAIN NYD - Acute	1		1			1		42.4
155	0	1			1	43	LEP	4	1			Recent knee trauma	MSK - STI	1			1		1		37.2
155A 11/10/19	1				1	67	BP	3	1			Chronic OA spine	PAIN NYD - Chronic	1		1	1	1	1		35.65
155B 11/11/24	1				1	68	EP	4	1			Cataracts	EYE - Chronic	1			1		1		37.2
155C 12/03/31	1				1	69	LEP	3		1		Gout	MSK - STI	1		1	1		1		56.95
159					1	35	CP	4		1		?stress	PSYCH - Minor - Anxiety	1					1		37.2
160					1	56	HTN	3	1			HTN	HTN - Chronic	1				1	1		56.95
161				1		49	RED	3		1		Abscess	SOFT TISSUE - Infxn - Minor	1		1	1		1		65.65
162					1	37	UEP	4		1		Soft tissue injuries	MSK - STI	1					1		42
163					1	50	COU	4		1		Viral bronchitis	URT - Acute - Minor	1			1	1	1		37.2
164					1	36	SOB	3		1		Asthma exacerbation	LRT - Acute - Asthma	1		1		1	1		88.8
166				1		28	LEI	4	1			Foot PAIN NYD	PAIN NYD - Chronic	1					1		42
167					1	79	CP	2			1	Unstable angina	CARDIO - Acute - ACS	1					1		73.9
168	0	1			1	54	NECK	2		1		Left cervical radicular PAIN	PAIN - Neuropathic	1		1	1		1		35.3
169	1				1	53	AP	3		1		Fibroids, pelvic PAIN	GYNE - Chronic - Fibroids	1		1	1		1		37.2
170					1	65	AP	3		1		CONS	GI - Minor - Constipation	1				1	1		65
171	0	1			1	69	RED	3			1	Small bowel obstruction	GI - Major - SBO		1				1		66.25
172	1				1	69	FU	3		1		CONS	GI - Minor - Constipation	1		1			1		88.8
173	1				1	69	AP	2			1	Small bowel obstruction	GI - Major - SBO		1				1		73.9
174	1				1	70	AP	3			1	Abdominal wall abscess	SOFT TISSUE - Infxn - Major		1		1		1		71.3
176					1	33	AP	2		1		PreSYN	SYNCOPE - Benign	1				1	1		95.1
177					1	33	CP - NC	4		1		CP NYD	CP NYD	1			1		1		46.3
179					1	39	BP	3		1		Contusion	MSK - STI	1					1		37.2
180					1	25	AP	3		1		Abdo PAIN NYD	ABDO PAIN NYD	1					1		52.2
181				1		53	UEI	3		1		Index finger numbness	NEURO - Acute - Minor	1					1		37.2
182					1	21	AP	2		1		Abdo PAIN NYD	ABDO PAIN NYD	1					1		42
183	0	1		1		46	CP	x		1		CP NYD	CP NYD	1					not billed
183A 12/9/9	1			1		47	HTN	4		1		Benign HA	HA - Benign	1					1		56.95
184	0	1		1		62	DV	2		1		BPPV	Vertigo - Peripheral	1				1	1		37.2
184A 11/9/28	1			1		61	LEP	4		1		Achilles tendinitis	MSK - STI	1		1			1		65.95
187	0	1	1		1	22	FU	3		1		Migraine	HA - Benign	1		1			1		93.1
187A 11/7/15	1				1	22	HA	2		1		Migraine	HA - Benign	1					1		104.8
187B 11/7/21	1				1	22	HA	3		1		HA, ?stress-related	HA - Benign	1		1			1		37.2
187C 11/7/28	1				1	22	HA	3		1		Tension HA	HA - Benign	1					1		35.3
187D 11/7/29	1				1	22	HA	3		1		HA	HA - Benign	1					1		37.2
187E 11/12/19	1				1	23	UEP	4		1		Arthritis	MSK - STI	1		1			1		65.95
188				1		44	rPTX	3			1	PTX	LRT - Acute - PTX		1				not billed (direct)
189				1		40	F	3		1		Gastroenteritis	GI - Minor - Gastro	1					not billed
192A 11/11/14	0	1	1		1	37	AP	4		1		Bilateral patellofemoral syndrome	MSK - STI	1			1		1		37.2
192B 11/11/16	1				1	37	FU	4		1		Fibroids, pelvic PAIN	GYNE - Chronic - Fibroids	1			1	1	1		35.65
192C 12/01/30	1				1	37	MENS	5		1		Pregnancy	OBS - Pregnancy	1			1	1	1		35.65
192D 12/01/31	1				1	37	FU	4		1		Pregnancy	OBS - Pregnancy	1			1	1	1		15
192E 12/3/11	1				1	37	LEP	3		1		Left foot PAIN NYD	PAIN NYD - Acute	1			1		1		65.95
195					1	38	AP	2			1	Miscarriage	OBS - Abortion	1		1		1	1		88.9
197				1		39	UEI	3		1		Right hamate fracture	MSK - # - Extremity	1		1			1		124.15
199					1	47	AP	3		1		Abdo PAIN NYD	ABDO PAIN NYD	1		1			1		52.2
200					1	34	AP	3		1		Abdo PAIN NYD	ABDO PAIN NYD	1		1	1	1	1		88.9
201					1	45	HA	2		1		HA NYD	HA - Benign	1					1		80
204	0	1			1	49	BP	4		1		LBP after fall	BACK PAIN - Mechanical	1				1	1		56.4
204A 11/6/3	1				1	51	LEP	4	1			Periumbilical hernia	GI - Minor - Hernia	1					1		35.3
207	0	1			1	33	vBLD	3		1		Menorrhagia	GYNE - Acute - Bleed		1				1		63.3
208	1				1	35	LEP	3		1		MCL injury	MSK - STI	1			1	1	1		42.4
209	1				1	35	FU	3		1		Left patellar subluxation	MSK - STI	1			1	1	1		35.65
211	0	1	1		1	36	SOB	3			1	Pneumonia	LRT - Acute - PNA	1		1			1		133.55
211A 11/10/27	1				1	36	CP - NC	3			1	MVC (pregnant)	TRAUMA - Blunt - Major	1					1		35.65
211B 11/8/16***redo	1				1	36	PREG	3			1	Threatened miscarriage	OBS - Abortion	1					1		37.2
211C 11/7/11	1				1	36	AP	3		1		Abdominal cramping	ABDO PAIN NYD	1					1		46.3
211D 11/5/12	1				1	36	AP	4		1		Gastroenteritis	GI - Minor - Gastro	1					1		37.2
212					1	30	AP	2		1		AP NYD	ABDO PAIN NYD	1					1		75.8
214	0	1		1		41	UEP	3		1		Paronychia	SOFT TISSUE - Infxn - Minor	1		1	1		1		61.05
215	1			1		41	CP	3			1	Pneumonia	LRT - Acute - PNA	1		1	1		1		118.6
215A 11/10/12	1			1		41	LEP	4	1			Post-amputation PAIN	PAIN - Neuropathic	1		1	1	1	1		42.4
215B 12/2/18	1			1		42	LEP	4	1			Post-amputation PAIN	PAIN - Neuropathic	1		1	1	1	1		56.95
215C 12/6/21	1			1		42	LEP	3	1			Post-amputation PAIN	PAIN - Neuropathic	1			1	1	1		42.4
218	0	1	1	1		42	GW	2			1	Sepsis (cellulitis)	SEPSIS		1					1		111.25	1							111.25
218A 11/5/30	1			1		41	SOB	3		1		Script refill, malingering	RX Refill	1		1			1		65.3
218B 11/5/16	1			1		41	ALL	3		1		Seasonal allergies	ALL - Minor	1					1		65.3
218C 11/5/13	1			1		41	SOB	3		1		ALL	ALL - Minor	1					1		42
218D 12/5/24	1			1		43	UEP	4		1		Otomycosis	ENT - Infxn - Minor	1		1		1	1		35.65
221	0	1			1	46	AP	3			1	Acute cholecystitis	GI - Major - Cholecystitis		1				1		116.3
222	1				1	47	AP	3		1		Abdo PAIN NYD	ABDO PAIN NYD	1					1		42.4
223	0	1			1	30	AP	4		1		Abdo PAIN NYD, pregnancy	ABDO PAIN NYD	1		1			1		52.2
223A 11/12/21	1				1	30	FU	4		1		Abdo PAIN NYD, pregnancy	ABDO PAIN NYD	1		1			1		35.65
224	0	1			1	20	AP	4	1			CP NYD	CP NYD	1					1		46.3
224A 12/6/29	1				1	20	EPI	3		1		EPI	ENT - Epistaxis	1					1		103.7
226					1	53	CP - NC	3	1			Right sternoclavicular dislocation	MSK - Dislocation	1		1		1		0	56.95			Hold (but IFH rate?)
228	0	1			1	28	FU	4		1		Muscular injuries (pregnant)	MSK - STI	1					1		35.65
228A 12/3/26	1				1	28	aTRA	3			1	MVC (pregnant)	TRAUMA - Blunt - Major	1					1		46.3
228B 11/12/2	1				1	27	POC	3			1	Extreme pre-term labour	OBS - Labour		1				1		37.2
228C 11/6/14	1				1	28	vBLD	3		1		Postpartum	OBS - Postpartum - Minor	1			1		1		42
235					1	33	EAR	4		1		Otitis media	ENT - Infxn - Minor	1		1			1		56.95
236	0	1			1	29	SZ	2			1	First episode SZ	NEURO - Acute - Sz	1				1	not billed
237	1				1	29	SZ	not recorded		1		UTI	GU - Acute - UTI	1		1		1		1		112.24	1	Paid						112.24
238					1	50	LEI	4			1	1st toe fracture	MSK - # - Extremity	1			1	1	1		74.25
239				1		45	LEI	3		1		Minor knee trauma	MSK - STI	1		1	1	1	1		55.55
240	0	1			1	35	FO	2			1	Oncologic F	ONC - Fever		1				1		105.9
240A 11/2/22	1				1	36	LEP	3		1		PAIN secondary to chemo	ONC - Chemo related	1		1			1		37.2
241	0	1			1	37	LEI	3			1	Right ankle fracture	MSK - # - Extremity	1			1		1		93.21
241A 12/2/3	1				1	35	RX	5	1			Ankle #	MSK - # - Extremity	1			1		1		15
244					1	35	CP - NC	3			1	Right pneumothorax	LRT - Acute - PTX	1			1		1		42
245				1		35	R	4		1		Benign HA, acne	HA - Benign	1				1	1		56.95
247	0	1		1		58	SYN	3			1	TIA	NEURO - Acute - TIA	1					1		29.8
247A 11/5/4	1			1		57	ALOC	2		1		SYN	SYNCOPE - Benign	1					1		123.5
248	1			1		57	sCVA	3		1		CP NYD	CP NYD	1			1		1		104.95
249				1		64	EP	2		1		HA NYD	HA - Benign	1					1		37.2
251	0	1			1	30	SRT	not recorded			1	Severe tonsillitis	URT - Acute - Major		1		1		1		85.15
251A 11/3/7	1				1	34	BP	3	1			Neck strain	MSK - STI	1		1			1		42
252					1	33	HA	3		1		Minor HI, neck strain	TRAUMA - Head - Minor	1		1	1		1		46.3
253	0	1		1		20	FP	2			1	Renal colic	RENAL - Acute - Colic	1		1			1		93.1
253A 11/8/16	1			1		20	FP	2			1	Renal colic	RENAL - Acute - Colic	1					1		42.4
259	0	1			1	26	COU	5		1		URI	URT - Acute - Minor	1					1		35.65
259A 12/4/10	1				1	26	VPN	4		1		Vaginitis	GYNE - Acute - Infectious	1		1			1		42.4
262					1	19	LEI	4		1		Laceration left big toe	TRAUMA - Lac	1					1		62.4
264					1	42	DIA	3			1	DIA, ?pneumonia	GI - Minor - Gastro	1		1			1		65
265	0	1			1	31	SRT	3		1		Abscess	SOFT TISSUE - Infxn - Minor	1		1	1		1		61.05
265A 11/8/13	1				1	31	FU	5		1		Abscess face	SOFT TISSUE - Infxn - Minor	1			1		1		56.4
266	0	1			1	60	LAB	3	1			Chronic kidney disease	RENAL - Chronic - CKD	1		1			1		46.3
267	1			1		61	GW	3			1	Hyperkalemia, pneumonia	METABOLIC - HyperK	1		1			1		63.3
268	1			1		61	CP	2		1		MSK CP	CP NYD	1				1	1		37.2
271				1		26	GW	3			1	Pneumonia (2nd to medulloblastoma, resulting resp failure)	LRT - Acute - PNA		1				1		65
275				1		38	HTN	2		1		Hypertensive urgency	HTN - Acute	1		1	1	1	1		74.25
276				1		25	AP	2			1	Renal colic	RENAL - Acute - Colic	1		1			1		99.4
277					1	30	UEI	3		1		Abscess finger	SOFT TISSUE - Infxn - Minor	1		1		1	1		102
278					1	32	CP	3		1		Chest wall PAIN	CP NYD	1					1		37.2
279				1		18	SOB	3		1		Asthma	LRT - Acute - Asthma	1		1			1		37.2
280	0	1		1		32	LEP	2		1		Left ankle soft tissue inj	MSK - STI	1		1			1		56.95
281	1			1		32	LEI	3		1		Ankle/foot sprain	MSK - STI	1					1		56.4
282	1			1		32	F	4			1	Pneumonia	LRT - Acute - PNA	1		1			1		37.2
284					1	45	HI	3		1		Minor HI	TRAUMA - Head - Minor	1					1		46.3
286	0	1		1		47	AP	2		1		Abdo PAIN NYD	ABDO PAIN NYD	1			1	1	1		50.3
286A 11/10/18	1			1		48	HTN	2	1			HTN	HTN - Acute	1		1	1	1	1		73.9				*recheck
287					1	32	HTN	3		1		MSK CP, HTN	CP NYD	1		1		1	1		97.6
289				1		35	GW	3			1	Pneumonia	LRT - Acute - PNA	1		1		1	1		42.4
292					1	42	RED	4		1		Inflamed sterno-clavicular joint	MSK - STI	1				1	1		46.3
294					1	47	UEP	3		1		MSK shoulder strain	MSK - STI	1					1		42
295					1	55	NV	3			1	Cholecystitis	GI - Major - Cholecystitis		1		1		1		35.3
298	0	1			1	32	AP	3		1		Ovarian cyst	GYNE - Acute - Cyst	1		1			1		76.1
298A 12/3/8	1				1	33	AP	3		1		Dysmenorrhea	GYNE - Acute - Dysmenorrhea	1		1				1		176.92	0	Collections, bad debt	*recheck	1	390	0	Collections	566.92
300	0	1		1		41	CP	2		1		CP NYD	CP NYD	1					1		73.19
300A 11/5/23	1			1		41	CP	2		1		Atypical CP	CP NYD	1					1		46.3
304					1	74	LEI	4		1		Soft tissue injury	MSK - STI	1					1		37.2
305	0	1			1	75	AP	3			1	Gastric tumour	ONC - New dx		1					1		29.85	0	Collections, bad debt						29.85
306	1				1	77	NV	3			1	Pancreatitis	GI - Major - Pancreatitis		1				1		37.2
307	0	1		1		44	F	2	1			F, HIV+	HIV Related	1		1	1		1		83.8
308	1			1		44	ALOC	3	1			HIV+	HIV Related	1			1	1	1		65
308A 11/6/4	1			1		44	CP	2		1		Confusion	CONFUSION NYD	1			1		1		63.3
308B 11/11/4	1			1		47	HTN	2	1			HTN	HTN - Chronic	1		1	1		1		35.65
309	0	1		1		68	SOB	2			1	Pneumonia	LRT - Acute - PNA	1		1			1		46.3
310	1			1		68	AP	3			1	Splenomegaly	GI - Major - Splenomegaly	1		1			1		37.2
310A 11/3/22	1			1		68	AP	3			1	Leukemia	ONC - New dx		1				1		73.9
311	0	1			1	23	hVENT	3			1	SZ	NEURO - Acute - Sz	1					1		37.2
311A 12/4/14	1				1	25	CP	2		1		CP NYD	CP NYD	1				1	1		103.7
311B 12/5/5	1				1	25	DV	2		1		Neck PAIN	PAIN NYD - Acute	1					1		65.95
313					1	50	BP	4		1		Mechanical BP	BACK PAIN - Mechanical	1			1	1	1		35.65
314	0	1			1	20	FU	5			1	Renal colic	RENAL - Acute - Colic	1				1	1		15
314A 11/8/19	1				1	20	AP	3		1		AP NYD	ABDO PAIN NYD	1					1		35.3
314B 12/1/7	1				1	21	PRU	4		1		PRU	Minor NOS	1					1		56.95
316	0	1			1	71	CONS	not recorded		1		Dizzy, CONS	Vertigo - NYD	1					1		103.7
316A11/4/5	1				1	71	EP	2	1			Chronic glaucoma	EYE - Chronic	1					1		42
317					1	41	CP	2			1	Hypothyroidism	ENDO - Acute		1				1		55.9
318				1		38	LEI	3		1		Soft tissue injury	MSK - STI	1			1		1		37.2
319				1		58	UEP	3		1		Radial neck fracture	MSK - # - Extremity	1					1		86.46
320	0	1			1	70	UEI	3		1		Colles # left wrist	MSK - # - Extremity	1			1		1		35.65
320A 11/1/9	1				1	70	DENT	3		1		Dental infection	DENT - Infxn	1		1			1		56.4
320B 11/1/12	1				1	70	DENT	4		1		Antibiotic DIA	GI - Minor - Gastro	1					1		46.3
321	1				1	71	UEI	not recorded			1	Pneumonia	LRT - Acute - PNA	1		1	1		1		63.3
321A 12/2/22	1				1	72	UEI	3		1		Tight cast	Minor NOS	1					1		25.25
322	1				1	72	HA	3			1	RO temporal arteritis	RHEUM - Acute - Major - GCA	1		1	1	1	not billed
323					1	34	CP	2		1		Chest wall PAIN	CP NYD	1		1			1		55.9
324				1		23	LAC	4		1		Laceration	TRAUMA - Lac	1			1		1		53.8
325					1	65	AP	2			1	Cholecystitis	GI - Major - Cholecystitis		1				1		52.2
326					1	22	AP	3		1		Epigastric PAIN NYD	ABDO PAIN NYD	1		1			1		37.2
329				1		73	ALOC	2			1	Urosepsis	SEPSIS		1				1		85.15
330				1		38	CP	2		1		Chest wall PAIN	CP NYD	1					1		37.2
331				1		19	HA	4		1		Sinusitis	ENT - Infxn - Minor	1		1			1		42.4
333				1		19	LEI	4		1		Ankle sprain	MSK - STI	1			1		1		18.7
337					1	54	AP	3		1		Gastritis likely	GI - Minor - Gastro	1		1	1	1	1		74.25
341				1		22	AP	3			1	Appendicitis	GI - Major - Appendicitis		1				1		121.94
342				1		50	DPG	3			1	Esophageal cancer	ONC - New dx		1				1		97.6
343				1		20	LEI	2		1		Right ankle soft tissue injury	MSK - STI	1						1		112.24	1	Paid in full						112.24
344					1	44	BP	3		1		MSK BP	BACK PAIN - Mechanical	1		1	1		1		37.2
345					1	32	HI	5		1		Concussion	TRAUMA - Head - Minor	1		1	1		1		50.65
348					1	20	SOB	4			1	Mastitis	SOFT TISSUE - Infxn - Major		1				1		37.2
349				1		33	BP	4			1	Cystic fibrosis	LRT - Chronic - CF	1		1			1		35.65
352	0	1		1		30	FP	2			1	Renal colic	RENAL - Acute - Colic	1		1			1		63.3
352A 12/6/11	1			1		31	SRT	3		1		Viral illness	URT - Acute - Minor	1			1		1		73.9
353					1	23	LEP	3		1		Ankle injury	MSK - STI	1					1		35.65
355				1		50	UEI	3		1		Soft tissue injuries	MSK - STI	1		1	1	1	not billed
356				1		73	AP	2			1	Pancreatitis	GI - Major - Pancreatitis		1		1		1		65.95
358	0	1			1	35	LEP	2	1			Chronic knee injury	MSK - STI	1			1		1		97.6
358A 11/9/18	1				1	36	FP	2		1		FP NYD	PAIN NYD - Acute	1		1	1	1	1		63.3
360				1		24	DIR	5	1			Obstructive UVJ	GU - Chronic - Obstr UVJ	1					1		37.2
363A 12/2/8	0	1		1		59	UEI	4		1		Wrist sprain	MSK - STI	1				1	1		35.65
363B 12/3/18	1			1		59	SRT	2		1		Viral URTI	URT - Acute - Minor	1					1		63.3
363C 12/4/25	1			1		59	PAIN	3	1			Neuropathy	PAIN - Neuropathic	1		1		1	1		35.65
366	0	1			1	28	POC	3	1			Abdo PAIN NYD	ABDO PAIN NYD	1						1		103.88	1	Paid in full						103.88
366A 11/7/4	1				1	28	POC	3	1			Chronic wound drainage	SOFT TISSUE - Infxn - Minor	1						1		70.25	1	Paid in full						70.25
366B 12/5/4	1				1	29	AP	4		1		Lower AP	ABDO PAIN NYD	1					1		35.65
368	0	1			1	37	LEP	3		1		Ankle #	MSK - # - Extremity	1					1		98.29
368A 11/3/8	1				1	36	AP	2		1		UTI	GU - Acute - UTI	1		1			1		46.3
370					1	30	LEI	4		1		Subungual hematoma	TRAUMA - Lac	1					1		44.45
372				1		41	BP	2		1		Back strain	BACK PAIN - Mechanical	1		1		1	1		56.4
374					1	62	AP	3		1		Soft tissue injury	MSK - STI	1			1	1	1		99.4
376				1		19	UEI	2		1		Shoulder instability	MSK - STI	1					1		63.3
382					1	71	AP	2		1		Chest wall PAIN	CP NYD	1		1	1	1	1		88.8
383					1	53	TOX	2		1		Alcohol intoxication	TOX - Minor	1					1		93.1
384	0	1	1	1		52	NV	5	1			Excessive salivation	Minor NOS	1					1		35.3
384A 11/1/31	1			1		50	EAR	4		1		Otitis media	ENT - Infxn - Minor	1			1	1	1		35.3				384-390 is all one guy
384B 11/2/21	1			1		53	FP	4	1			Lumbar facet arthritis	BACK PAIN - Mechanical	1					1		63.3
384C 11/4/21	1			1		52	COU	5	1			Salivation	Minor NOS	1					1		15
385	1			1		53	DIST	4	1			Chronic abdo PAIN NYD	ABDO PAIN NYD - Chronic	1		1			1		37.2
385A 11/8/1	1			1		53	AP	4	1			Hernia	GI - Minor - Hernia	1					1		56.4
386	1			1		53	AP	3	1			CONS	GI - Minor - Constipation	1		1			1		56.95
387	1			1		52	AP	4	1			CONS	GI - Minor - Constipation	1		1			1		35.65
388	1			1		52	DIST	4	1			Chronic abdo PAIN	ABDO PAIN NYD - Chronic	1					1		35.65
388A 12/1/29	1			1		52	AP	3	1			CONS	GI - Minor - Constipation	1		1			1		63.3
388B 12/2/6	1			1		53	AP	4	1			Chronic abdo PAIN	ABDO PAIN NYD - Chronic	1					1		35.65
388C 12/2/26	1			1		53	RED	5		1		Paronychia	SOFT TISSUE - Infxn - Minor	1		1			1		82.7
389	1			1		53	AP	3	1			CONS	GI - Minor - Constipation	1					1		37.2
390	1			1		52	LAC	4		1		Laceration	TRAUMA - Lac	1					1		181.6
390A 12/4/16	1			1		53	AP	3	1			Chronic abdo PAIN NYD	ABDO PAIN NYD - Chronic	1					1		35.65
396	0	1			1	27	FU	3		1		Biliary colic	GI - Minor - Biliary Colic	1		1			1		35.65
396A 11/4/23	1				1	27	BP	2		1		Biliary colic	GI - Minor - Biliary Colic	1		1		1	1		125.05
400					1	17	GW	4		1		Viral illness	URT - Acute - Minor	1					1		63.3
401					1	41	LEI	4		1		Soft tissue injury	MSK - STI	1				1	1		35.65
402	0	1		1		44	LEP	4		1		Gout	MSK - STI	1		1	1		1		65
402A 11/4/27	1			1		44	LEP	3		1		Gout	MSK - STI	1		1	1		1		35.3
402B 11/4/28	1			1		44	LEP	4		1		Gout	MSK - STI	1		1	1	1	1		77.3
403				1		31	F	3			1	Disseminated varicella	SEPSIS		1				1		73.9
404					1	18	COU	5		1		Bronchitis	LRT - Acute - Bronchitis	1			1	1	1		56.95
Total n = 357	156	73	10	155	202	41			62	222	72			317	39	126	107	79		14	57.3555	131.139	7			4	990.037	1
																													TOTAL:	5796.1
					Mean	42.2913	1				*#83 visit not recorded (LWBS)																		AVG:	414.007
					Median	41																							MEDIAN:	119.105
					Mode	35
					STD	14.7431

## Sheet: Post 2012
Patient	Repeat?	Pt with multiple visits?	FF?	Male	Female	Age	CPC	CTAS Score	Discharge Dx: Chronic	Discharge Dx: Acute Minor	Discharge Dx: Acute Major	Discharge Dx	Discharge Dx Category	Disposition: Home	Disposition: Admission	Prescription?	GP?	Told to FU GP?	Claim: Accepted	Claim: Rejected	Accepted Amount	Rejected Amount	Rejected - Paid?	Status		Claim 2: Rejected	Rejected Amount 2	Rejected - Paid? 2	Status 2	TOTAL COSTS
3				1		35	GRO	2		1		Epididymitis	GU - Acute - Epididymitis	1		1			1		42.4
4	0	1			1	66	PAL	2			1	RO ACS	CARDIO - Acute - ACS		1	NA			1		65
5	1				1	67	LEP	5	1			Right knee OA	MSK - STI	1						1		70.25	0	Collections, bad debt		1	473.45	0	Collections	543.7
8	0	1			1	34	AP	3			1	RO tubo-ovarian abscess	GYNE - Acute - Infectious	1		1	1	1	1		61.3
9	1				1	35	FU	4		1		Inguinal pain NYD	ABDO PAIN NYD	1			1	1	1		35.65
14					1	46	CP	2		1		Atypical CP	CP NYD	1				1	1		37.2
16					1	26	BP	3		1		Chest wall strain	MSK - STI	1						1		147.07	1	Paid in full						147.07
17					1	42	AP	2			1	Appendicitis	GI - Major - Appendicitis		1	NA			1		88.8
25	0	1		1		26	SRT	4		1		Laryngitis	URT - Acute - Minor	1					1		63.3
26	1			1		26	REY	4		1		Conjunctivitis, shin splints	EYE - Acute - Infn	1					1		35.65
28	0	1			1	37	HI	3		1		Concussion	TRAUMA - Head - Minor	1					1		63.3
29	1				1	38	ALOC	2			1	ICH	NEURO - Acute - CVA		1				not billed (direct)
30	0	1			1	64	AP	3		1		Gastroenteritis, ?PUD	GI - Minor - Gastro	1		1		1	1		37.2
30A 12/9/18	1				1	64	AP	2	1			Chronic GI c/o NYD	ABDO PAIN NYD - Chronic	1					1		46.3
30B 12/12/11	1				1	65	BP	4		1		Left sciatica	BACK PAIN - Mechanical	1		1		1	1		37.2
38	0	1			1	28	F	2			1	Endometritis	GYNE - Acute - Infectious		1	NA	1		1		73.9
38A 13/8/7	1				1	28	F	3		1		Mastitis	SOFT TISSUE - Infxn - Minor	1		1		1	1		73.9
41					1	28	GW	3			1	PID	GYNE - Acute - Infectious	1		1			1		42.4
42					1	72	LEI	4	1			Knee OA	MSK - STI	1				1	1		65.95
47					1	16	FP	3		1		Abdo pain NYD	ABDO PAIN NYD	1		1			1		93.1
48				1		25	RPP	3		1		Pilonidal abscess	SOFT TISSUE - Infxn - Minor	1				1	1		70.73
49				1		22	CP	2	1			CP NYD	CP NYD	1				1	1		73.9
50	0	1	1	1		76	SOB	3		1		Bronchitis, ?pneumonia	LRT - Acute - Bronchitis	1		1			1		114.3
50A 13/01/29	1			1		76	SOB	3	1			CHF	CARDIO - Acute - CHF	1				1	1		103.7
50B 13/3/12	1			1		76	ABR	4	1			Old scar/wound	Minor NOS	1				1	1		42.4
50C 13/4/20	1			1		76	CP	5	1			Rx refill	RX Refill	1		1		1	1		25.5
50D 13/5/5	1			1		76	SOB	NA		1		COPD	LRT - Acute - COPDE	1		1			1		63.3
51					1	54	HA	4		1		Oral lesion NYD, breast pain NYD	ENT - Infxn - Minor	1					1		35.65
58	0	1		1		58	AP	3	1			?chronic prostatitis	GU - Chronic - Prostatitis	1		1	1	1	1		88.8
59	1			1		60	COU	NA		1		L pneumonia	LRT - Acute - PNA	1		1	1		1		56.95
60	1			1		57	CP	3		1		CP NYD	CP NYD	1			1	1	1		42.4
64	0	1		1		39	FP	3		1		FP NYD	PAIN NYD - Acute	1					1		37.2
64A 13/5/11	1			1		40	DIA	3		1		Gastroenteritis	GI - Minor - Gastro	1					1		56.95
66B 13/6/15				1		60	UEP	3	1			?gout	MSK - STI	1		1	1	1	1		56.95
68					1	19	LEI	2			1	Pelvic fracture	MSK - # - Pelvis		1	NA			1		85.15
69				1		32	AP	2			1	Appendicitis	GI - Major - Appendicitis		1	NA			1		73.9
75					1	42	AP	3		1		?early viral illness	URT - Acute - Minor	1						1		74.03	1	Paid in full						74.03
78				1		7	HI	4		1		Facial laceration	TRAUMA - Lac	1			1		1		66.05
79				1		24	LEI	3		1		Fracture 1st metatarsal	MSK - # - Extremity	1					1		42.4
81	0	1	1		1	39	PAL	3		1		Asthma	LRT - Acute - Asthma	1		1		1	1		76.1
82	1				1	39	SOB	3		1		Environmental exposure	ENVIRO - Minor	1		1			1		63.3
82A 13/4/19	1				1	40	SOB	3	1			ANX	PSYCH - Minor - Anxiety	1				1		1		65.95	0	Invoiced						65.95
82B 13/6/5	1				1	40	NECK	4		1		Neck strain	MSK - STI	1		1			1		35.65
83	1				1	40	NECK	3		1		C7 radiculopathy	PAIN - Neuropathic	1		1			1		35.65
88					1	34	AP	4	1			Chronic pelvic pain	ABDO PAIN NYD - Chronic	1		1			1		88.9
95	0	1			1	36	CP	2		1		CP	CP NYD	1					1		76.1
96	1				1	36	CP	2		1		CP NYD	CP NYD	1		1			1		88.8
97	1				1	37	CP	2		1		CP NYD	CP NYD	1					1		63.3
99					1	51	CP	2		1		?MSK CP	CP NYD	1					1		88.8
101	0	1		1		31	PAL	2			1	Atrial fibrillation	CARDIO - Acute - Arrhythmia	1				1		1		297.02	0	Collections, bad debt						297.02
101A 13/7/7	1			1		31	PAL	3		1		Atrial fibrillation, resolved	CARDIO - Acute - Arrhythmia	1					1		42.24
105B 13/01/29					1	63	SOB	2	1			SOB NYD	SOB NYD	1			1			1		74.03	0	Invoiced		1	528.4	0	Collections	602.43
106					1	56	UEP	2		1		MSK shoulder pain	MSK - STI	1					1		88.8
107				1		38	AP	3	1			GERD	GI - Minor - GERD	1		1			1		82.45
108				1		34	UEI	3		1		Laceration	TRAUMA - Lac	1		1	1		1		82.45
110	0	1			1	43	CP	2	1			ANX/somatization	PSYCH - Minor - Anxiety	1			1	1	1		42.4
110C 12/12/1	1				1	43	DENT	4	1			Tongue lesion NYD	ENT - Infxn - Minor	1					1		56.95
111	0	1		1		20	BP	3		1		MSK BP	BACK PAIN - Mechanical	1		1			1		37.2
111A 13/3/14	1			1		20	BP	NA		1		Lumbar sprain	BACK PAIN - Mechanical	1		1			1		43.6
112A 12/11/13				1		64	CP	4	1			GERD	GI - Minor - GERD	1		1		1		1		103.88	0	Collections, bad debt		1	643.2	0	Collections	747.08
114A 13/11/19				1		31	UEP	4		1		Paronychia	SOFT TISSUE - Infxn - Minor	1		1	1			1		121.5	0	Invoiced		1	430	0	Collections	551.5
116	0	1			1	31	SRT	4		1		Pneumonia	LRT - Acute - PNA	1		1	1		not billed (self pay)
117	1				1	32	CP	2		1		CP NYD	CP NYD	1			1		not billed (self pay)
119A 12/8/7				1		34	AP	4		1		Enteritis	GI - Minor - Gastro	1						1		74.03	0	Collections, bad debt						74.03
120					1	32	UEP	3		1		MSK CP	CP NYD	1					1		37.2
123A 13/3/18	0	1		1		43	LEP	3	1			Groin pain NYD	ABDO PAIN NYD	1		1	1			1		111.25	0	Collections, bad debt		1	502.75	0	Collections	614
123B 13/3/21	1			1		43	FU	x			1	Incarcerated hernia	GI - Major - Incarcerated hernia	1			1	1		1		70.25	0	Collections, bad debt		1	1028.9	0	Collections	1099.15
127	0	1	1	1		39	GW	4		1		CP	CP NYD	1					1		73.9
127A 12/6/30	1			1		39	SENS	3	1			ANX/stress	PSYCH - Minor - Anxiety	1					1		65.95
127B 12/8/6	1			1		39	AP	3		1		Dyspepsia	GI - Minor - GERD	1				1	1		73.9
128	1			1		39	CP	2	1			CP NYD	CP NYD	1					1		46.3
128A 12/12/3	1			1		39	MIN	4	1			Prolapsed hemorrhoids	GI - Minor - Hemorrhoids	1		1			1		42.4
129	1			1		40	CP	3		1		CP NYD	CP NYD	1					1		63.3
129A 13/10/5	1			1		40	UEP	3		1		MSK arm pain/neck pain	PAIN NYD - Acute	1		1		1	1		56.95
130	0	1			1	58	AP	x			1	Pancreatitis	GI - Major - Pancreatitis	1		1	1		1		65
131	1				1	58	AP	2			1	Cholangitis	GI - Major - Cholangitis		1		1		1		46.3
135	0	1			1	47	CP	3		1		CP	CP NYD	1		1			1		52.2
135A 13/5/3	1				1	48	SRT	5	1			Pharyngitis	URT - Acute - Minor	1		1			1		37.2
136				1		18	LAC	3		1		Finger laceration	TRAUMA - Lac	1					1		83.7
138					1	32	AP	3			1	Appendicitis	GI - Major - Appendicitis		1				1		80.95
139	0	1			1	30	F	2			1	Pericarditis	CARDIO - Acute - Pericarditis	1		1			1		55.9
139A 12/9/24	1				1	30	AP	4		1		Gastritis	GI - Minor - Gastro	1				1	1		37.2
141					1	36	DV	3		1		Viral illness	URT - Acute - Minor	1					1		46.3
144					1	31	AP	3			1	Appendicitis	GI - Major - Appendicitis		1				1		37.2
146				1		23	LEP	4	1			Healing calcaneal fracture	MSK - # - Extremity	1					1		35.65
147A 13/11/13				1		51	GRO	4		1		ANX	PSYCH - Minor - Anxiety	1						1		70.25	1	Paid in full		1	462.85	1	Paid	533.1
152					1	39	CP	3		1		Abdo pain NYD	ABDO PAIN NYD	1					1		73.9
153					1	67	AP	2		1		Abdo pain NYD	ABDO PAIN NYD	1				1	1		63.3
154					1	40	LBC	5	1			Asymmetrical oligoathropathy	MSK - STI	1		1			1		63.3
156					1	20	HA	4	1			Chronic migraine	HA - Benign	1			1		1		37.2
157	0	1			1	61	fTRA	4		1		fTRA	TRAUMA - Head - Minor	1					1		147.32
158	1				1	62	UEI	3		1		Radial head fracture	MSK - # - Extremity	1					1		102.19
165				1		30	AP	3		1		Gastritis	GI - Minor - Gastro	1		1			1		61.1
174A 12/09/29					1	70	CP	3		1		Breast mass	SOFT TISSUE - Mass	1			1	1	1		63.3
175	0	1		1		46	LEI	3		1		MSK injuries	MSK - STI	1		1				1		112.24	0	Invoiced						112.24
175A 12/10/6	1			1		46	VIS	2	1			Decreased vision NYD	EYE - Acute - Vision change	1						1		125.97	0	Invoiced		1	405	0	Collections	530.97
175B 13/6/29	1			1		47	DENT	4		1		Dental infection	DENT - Infxn	1		1	1			1		112.24	0	Invoiced		1	720	0	Collections	832.24
178					1	38	SRT	4		1		ANX	PSYCH - Minor - Anxiety	1						1		83.58	0	Invoiced						83.58
185				1		19	COU	4		1		Influenza	URT - Acute - Minor	1					1		35.63
186				1		63	JTS	4		1		Left ankle ulcer NYD	DERM - Minor	1					1		97.6
190					1	41	SUI	2	1			PTSD, depression	PSYCH - Minor - PTSD	1		1	1	1	not billed
191	0	1			1	39	AP	2			1	RO ectopic	OBS - Ectopic	1					not billed (direct)
192	1				1	39	FU	4			1	Spontaneous abortion	OBS - Abortion	1					not billed (direct)
192F 13/7/25	1				1	39	AP	2			1	RO ectopic	OBS - Ectopic	1					1		46.3
193	1				1	39	SOB	3			1	Ruptured ectopic	OBS - Ectopic		1				not billed (direct)
194				1		40	BP	3		1		L3-L4 facet syndrome	BACK PAIN - Mechanical	1		1			1		82.45
196				1		41	AP	3		1		CP NYD	CP NYD	1		1			not billed
198				1		53	LAC	3		1		Finger laceration	TRAUMA - Lac	1				1	1		67.95
202				1		46	LEI	3		1		Left ankle sprain	MSK - STI	1			1		1		42.4
203	0	1		1		40	SOB	2	1			Chronic CP NYD	CP NYD	1					1		37.2
203A 13/10/16	1			1		40	LEP	3	1			Diabetic neuropathy	PAIN - Neuropathic	1		1		1		1		70.25	0	Invoiced		1	430	0	Collections	500.25
203B 13/11/21	1			1		40	RED	4		1		Toe cellulitis	SOFT TISSUE - Infxn - Minor	1		1		1	1		37.2
204B 12/8/16	0	1			1	52	UEI	5		1		Wrist soft tissue injury	MSK - STI	1				1	1		35.65
205	1				1	52	LEI	4		1		Minor trauma, multiple	MSK - STI	1					1		56.95
205A 13/3/23	1				1	53	PAIN	5		1		Viral URTI	URT - Acute - Minor	1		1		1	1		56.95
206					1	44	FP	2		1		Renal colic	RENAL - Acute - Colic	1		1			1		46.3
209A 12/9/26	0	1			1	34	AP	2		1		Abdo pain NYD	ABDO PAIN NYD	1			1	1		1		265.69	0	Invoiced		1	732.6	0	Collections	998.29
209B 13/8/23	1				1	35	AP	3		1		Abdo pain NYD	ABDO PAIN NYD	1		1	1	1		1		147.07	0	Invoiced		1	462.85	0	Collections	609.92
210					1	64	HA	2			1	Pancreatitis	GI - Major - Pancreatitis		1					1		92.14	0	Bad debt - NFA/shelter						92.14
213					1	26	NV	3		1		Gastroenteritis	GI - Minor - Gastro	1				1	1		65
216					1	39	LEP	3	1			Radiculopathy	PAIN - Neuropathic	1		1			1		33.7
217					1	56	HA	4		1		HA	HA - Benign	1					not billed
219	0	1		1		43	SOB	3		1		Asthma	LRT - Acute - Asthma	1					1		73.9
220	1			1		43	SOB	3		1		Asthma	LRT - Acute - Asthma	1					1		63.3
220A 13/6/27	1			1		44	PAB	2			1	Paranoid schizophrenia	PSYCH - Major - Psychosis		1					1		169.46	1	Paid in full						169.46
223B 12/9/13	0	1			1	31	AP	3		1		UTI	GU - Acute - UTI	1		1		1		1		92.14	0	Invoiced		1	675	0	Collections	767.14
223C 12/9/14	1				1	31	FU	4		1		Pregnancy (not new dx)	OBS - Pregnancy	1				1		1		70.25	0	Invoiced		1	1166.4	0	Collections	1236.65
225				1		19	HA	4		1		Cold	URT - Acute - Minor	1					1		42.4
227					1	28	UEP	4		1		Tight ring	Minor NOS	1					not billed (direct)
229					1	35	EP	4	1			Blurred vision	EYE - Chronic	1				1	1		35.65
230	0	1			1	35	COU	4		1		Influenza	URT - Acute - Minor	1					1		73.9
231	1				1	37	DV	2		1		Syncope	SYNCOPE - Benign	1				1	1		46.3
232	1				1	38	ANX	2	1			Social problems	Social concerns	1					1		35.65
233	1				1	38	EDC	3		1		Allergy	ALL - Minor	1				1	1		56.95
234					1	34	FBS	4		1		Tight ring	Minor NOS	1					1		25.5
241B 12/12/27					1	37	UEP	4		1		Rotator cuff tendinitis	MSK - STI	1		1	1	1	1		78.84
242	0	1		1		18	LAC	3		1		Lip laceration	TRAUMA - Lac	1					1		64.99
243	1			1		18	UEI	4		1		?mallet finger	MSK - Dislocation	1					1		42.4
246				1		56	PAL	2		1		Palpitations NYD	CARDIO - Acute - Palp	1		1	1		1		52.2
250				1		30	TEST	3		1		Epididymitis	GU - Acute - Epididymitis	1					1		78.05
254	0	1			1	58	R	3		1		Cellulitis vs nodule	SOFT TISSUE - Infxn - Minor	1		1			1		50.65
254A 13/2/12	1				1	58	HTN	3	1			Insomnia, depressed mood	PSYCH - Minor - Insomnia	1		1			1		37.2
255	0	1			1	24	R	3		1		Spider bite	SOFT TISSUE - Infxn - Minor	1		1			1		35.65
256	1				1	24	HA	4	1			HA	HA - Benign	1		1			1		37.2
257	1				1	24	PREG	3		1		RLQ pain	ABDO PAIN NYD	1					1		37.2
258					1	36	POC	3		1		Abscess vs seroma	SOFT TISSUE - Infxn - Minor	1			1	1	1		35.65
260	0	1		1		19	NV	2			1	Post-chemo N/V	ONC - Chemo related		1				1		113.5
260A 13/4/25	1			1		19	HA	2		1		Post-biopsy pain	PAIN NYD - Acute	1					1		35.65
261	0	1			1	36	FU	3		1		Constipation	GI - Minor - Constipation	1					1		35.65
261A 13/11/17	1				1	36	DIA	3		1		Abdo pain NYD	ABDO PAIN NYD	1		1		1	1		88.8
263					1	26	CP - NC	2		1		CP NYD	CP NYD	1			1		1		37.2
268A 12/9/11	0	1		1		62	AP	not recorded	1			Chronic renal failure	RENAL - Chronic - CKD	1					1		65
268B 12/9/28	1			1		61	CP	2		1		Chest wall pain	CP NYD	1					1		37.2
268C 12/10/10	1			1		61	PAIN	3	1			Metastatic colon ca	ONC - New dx	1		1			1		37.2
269	0	1			1	75	LEP	3	1			HTN	HTN - Chronic	1		1			not billed
270	1				1	76	AP	2			1	Strangulated incisional hernia	GI - Major - Incarcerated hernia		1		1		1		37.2
272				1		25	GW	2			1	Phenytoin toxicity	TOX - Major		1		1		1		46.3
273	0	1			1	37	COU	3		1		Post viral COU	URT - Acute - Minor	1		1			1		35.65
274	1				1	37	SOB	3		1		Asthma exacerbation	LRT - Acute - Asthma	1		1		1	1		63.3
274A 13/6/18	1				1	38	FP	2		1		?pyelonephritis	RENAL - Acute - Infxn	1		1			1		103.7
274B 13/12/18	1				1	37	COU	3		1		Viral URTI, asthma	URT - Acute - Minor	1		1				1		84.38	1	Paid in full						84.38
275A 12/10/2				1		39	HA	3		1		Benign HA	HA - Benign	1		1	1			1		74.03	0	Invoiced	*recheck this one	1	2840	1	Paid	2914.03
283					1	32	LAC	3		1		Laceration	TRAUMA - Lac	1					1		55.65
285				1		25	R	4		1		Folliculitis, caries, ?viral illness	SOFT TISSUE - Infxn - Minor	1		1		1	1		46.3
286B 13/5/11				1		50	CP	3		1		Chest wall pain, bronchitis	CP NYD	1		1	1	1		1		125.97	0	Invoiced	*recheck	1	529.4	0	Collections	655.37
288	0	1			1	32	UEP	3		1		Radial head fracture	MSK - # - Extremity	1		1			1		119.19
288A 12/11/7	1				1	32	UEP	3		1		Post-op pain	PAIN NYD - Acute	1		1			1		42.4
290	0	1			1	68	FP	3		1		BP NYD	BACK PAIN - Mechanical	1		1			1		93.1
291	1				1	68	NV	3		1		Sciatica, constipation	BACK PAIN - Mechanical	1		1			1		103.7
293				1		27	LAC	3		1		Laceration	TRAUMA - Lac	1						1		145.48	0	Invoiced						145.48
295 A 13/9/16					1	57	DIR	3			1	RML pneumonia	LRT - Acute - PNA	1		1	1	1	1		46.3				*recheck
296	0	1			1	42	BP	3	1			MSK low BP, sciatica	BACK PAIN - Mechanical	1		1			1		104.2
297	1				1	43	HA	2	1			Migraine HA	HA - Benign	1		1			1		61.1
299				1		49	CP	2			1	NSTEMI	CARDIO - Acute - ACS		1				1		46.3
301	0	1		1		37	CP	3			1	Pneumonia	LRT - Acute - PNA	1		1			1		65.95
302	1			1		37	SRT	4			1	LUL pneumonia	LRT - Acute - PNA	1		1			1		63.3
303	1			1		37	SRT	4	1			Viral illness	URT - Acute - Minor	1					1		65.95
311C 12/7/23	0	1			1	24	BP	3		1		Back strain	BACK PAIN - Mechanical	1		1			1		37.2
311D 12/7/31	1				1	24	BP	4		1		Mechanical BP	BACK PAIN - Mechanical	1					1		18.7
312	1				1	25	LEI	3		1		Right leg soft tissue injury	MSK - STI	1					1		107.4
312A 13/3/12	1				1	25	GW	3		1		?pseudoseizure	PSYCH - Minor - Pseudoseizure	1					1		46.3
315	0	1		1		40	HTN	2	1			Pituitary tumour	ONC - New dx	1					1		88.8
315A 13/5/20	1			1		41	CP - NC	3		1		?chest wall pain	CP NYD	1			1		1		56.95
321B 12/12/25					1	70	LBC	4		1		Blocked sublingual salivary gland	ENT - Oral - Minor	1		1	1		1		56.95
327	0	1			1	30	DEV	5		1		Picc line dressing change	Medical device	1			1		not billed (direct)
328	1				1	28	BP	3			1	Cancer pain	ONC - Pain		1		1		1		37.2
332				1		32	AP	3		1		CP NYD	CP NYD	1			1	1		1		74.03	1	Paid in full						74.03
334					1	64	DV	3		1		HA	HA - Benign	1				1	1		97.6
335	0	1			1	28	NECK	3		1		Fall	TRAUMA - Blunt - Minor	1		1			1		46.3
335A 13/3/19	1				1	29	vBLD	3		1		Anovulatory bleed	GYNE - Acute - Bleed	1		1		1	1		73.9
336	1				1	29	vBLD	3		1		Menometrorrhagia	GYNE - Acute - Bleed	1		1			1		55.9
338				1		32	BP	3			1	BP, chronic fracture	BACK PAIN - Mechanical		1				1		55.9
339	0	1		1		60	TEST	3		1		Epididymal cyst	GU - Acute - Epididymitis	1		1			1		74.25
339A 13/2/8	1			1		61	BP	3	1			Multiple complaints	Minor NOS	1		1			1		37.2
340	1			1		61	CP	3		1		MSK CP	CP NYD	1					1		37.2
346				1		27	NECK	3		1		Neck pain NYD	PAIN NYD - Acute	1		1		1	1		56.95
347					1	38	SUI	2			1	SUI ideation	PSYCH - Major - Suicidal		1				1		35.65
350				1		34	BP	4		1		Back strain	BACK PAIN - Mechanical	1		1		1	1		35.65
351	0	1			1	60	UEI	3			1	?DVT left arm	THROMBOSIS - DVT	1		1			1		46.3
351A 13/9/17	1				1	59	POC	3		1		Post-op complications	POSTOP - Complications	1					1		37.2
352B 12/9/8	0	1		1		31	NECK	3		1		CP NYD	CP NYD	1			1	1	1		73.9
352C 13/9/30	1			1		32	FP	3			1	Renal colic	RENAL - Acute - Colic	1		1	1	1	1		52.2
352D 13/10/4	1			1		32	FU	4		1		Renal colic resolved	RENAL - Acute - Colic	1			1	1	1		35.65
352E 13/12/13	1			1		32	TEST	3			1	Renal colic	RENAL - Acute - Colic	1			1	1		1		74.03	0	Invoiced		1	430	1	Partial payments	504.03
352F 13/12/20	1			1		32	FP	3			1	Renal colic	RENAL - Acute - Colic	1		1	1		1		52.2
353A 13/8/6	0	1			1	25	PREG	3		1		Emesis in pregnancy	OBS - Pregnancy NV	1		1		1	1		54.35
353B 13/8/21	1				1	25	NV	4	1			Emesis in pregnancy	OBS - Pregnancy NV	1		1		1	1		35.65
353C 13/8/28	1				1	25	PREG	3	1			Constipation, N/V of pregnancy	GI - Minor - Constipation	1		1		1	1		37.2
354	0	1		1		26	CP	3		1		MSK CP	CP NYD	1					1		37.2
354A 13//11/6	1			1		25	TEST	2		1		Testicular pain	PAIN NYD - Acute	1					1		42.4
354B 13/11/7	1			1		26	FU	4		1		Varicocele and hydrocele	GU - Acute - Hydrocele	1					1		15
357					1	33	EFB	4		1		Conjunctivitis	EYE - Acute - Infn	1		1				1		29.85	1	Paid in full						29.85
359	0	1		1		52	CP	2			1	STEMI	CARDIO - Acute - ACS		1		1			1		259.62	0	Invoiced						259.62
359A 12/10/5	1			1		52	SOB	2			1	Pulmonary edema	CARDIO - Acute - CHF		1		1			1		74.03	0	Invoiced						74.03
361					1	50	BP	3	1			Chronic sciatica	BACK PAIN - Mechanical	1		1		1	1		55.9
362					1	44	CP	3		1		CP	CP NYD	1					1		97.6
363	0	1		1		62	LEI	3		1		Synovitis	MSK - STI	1		1			1		108.7
364	1			1		60	BP	2		1		BP	BACK PAIN - Mechanical	1		1		1	1		46.3
364A 13/4/5	1			1		60	LEP	3		1		Gout	MSK - STI	1		1			1		37.2
365	1			1		61	LEI	3		1		Gout	MSK - STI	1					1		68.19
366C 12/7/12	0	1			1	30	HA	3		1		F NYD	Fever	1					1		35.65
366D 12/7/20	1				1	30	AP	3		1		?Hernia	GI - Minor - Hernia	1				1	1		73.9
367	1				1	30	FU	4		1		Left ovarian cyst	GYNE - Acute - Cyst	1				1	1		37.2
368B 13/11/26					1	38	AP	3		1		Abdo pain NYD	ABDO PAIN NYD	1			1	1	1		37.2
369				1		34	TEST	3		1		?epididymitis	GU - Acute - Epididymitis	1		1			1		37.2
371					1	32	SOB	2		1		CP	CP NYD	1				1	1		35.65
373				1		52	LAB	2			1	ESRD	RENAL - Chronic - CKD		1				not billed (direct)
375	0	1		1		32	LEP	4	1			Hip pain NYD	PAIN NYD - Acute	1					1		55.9
375A 12/12/5	1			1		32	RPP	3		1		?ischial bursitis	MSK - STI	1					1		46.3
377					1	30	NV	3		1		Gastroenteritis	GI - Minor - Gastro	1		1	1		1		150.3
378				1		35	AP	3	1			Ulcerative colitis	GI - Major - IBD	1					1		63.3
379	0	1	1	1		32	FP	2			1	Renal colic	RENAL - Acute - Colic	1		1			1		46.3
380	1			1		32	FP	2			1	Renal colic	RENAL - Acute - Colic	1		1			1		52.2
380A 12/12/10	1			1		33	FP	3			1	Renal colic	RENAL - Acute - Colic	1					1		37.2
380B 12/12/17	1			1		32	FP	2			1	Renal colic	RENAL - Acute - Colic	1		1			1		37.2
380C 12/12/28	1			1		32	FP	2			1	Renal colic	RENAL - Acute - Colic	1		1			1		56.95
381				1		31	LEP	2		1		Tibial plateau #	MSK - # - Extremity	1					1		91.82
390B 12/8/18	0	1		1		53	PEN	4		1		Balanoposthitis	GU - Acute - Balanitis	1		1				1		112.24	0	Invoiced		1	675	0	Collections	787.24
390C 12/10/18	1			1		54	AP	2		1		UTI, BPH	GU - Acute - UTI	1		1				1		83.58	0	Invoiced		1	675	0	Collections	758.58
391				1		25	eTRA	2		1		Corneal ABR	EYE - Acute - Trauma	1					1		35.65
392				1		29	UEI	4		1		Fracture 5th metacarpal	MSK - # - Extremity	1				1	1		56.95
393				1		46	DIR	2			1	SAH	NEURO - Acute - CVA		1					1		293.93	0	Invoiced						293.93
394	0	1			1	82	BP	3	1			Spinal stenosis	BACK PAIN - Mechanical		1				1		73.9
394A 12/10/11	1				1	82	LEP	3	1			Spinal stenosis	BACK PAIN - Mechanical	1		1			1		46.3
394B 13/2/5	1				1	83	LEP	4	1			Spinal stenosis	BACK PAIN - Mechanical		1				1		46.3
395	0	1			1	82	LEI	3		1		Pelvic fracture	MSK - # - Pelvis	1					1		73.9
395A 13/7/22	1				1	82	F	3			1	?bacteremia	SEPSIS	1		1	1		1		46.3
395B 13/11/24	1				1	82	GW	not recorded			1	CHF	CARDIO - Acute - CHF		1		1		1		133.3
397	0	1	1	1		36	UEI	4		1		Soft tissue injury	MSK - STI	1		1	1		1		42.4
398	1			1		37	EP	4		1		Periorbital cellulitis	SOFT TISSUE - Infxn - Minor	1		1			1		56.95
398A 13/10/28	1			1		37	REY	3		1		Periorbital cellulitis	SOFT TISSUE - Infxn - Minor	1		1			1		66.5
398B 12/10/29	1			1		37	FU	3		1		Periorbital cellulitis	SOFT TISSUE - Infxn - Minor	1					1		65.45
399	1			1		37	FU	4		1		Frontal sinus mucocele	ENT - Mass - Minor	1					1		37.2
399A 13/11/5	1			1		38	VIS	2		1		Frontal sinus mucocele	ENT - Mass - Minor	1					1		35.65
402C 13/8/28				1		46	UEP	3		1		Gout	MSK - STI	1		1	1	1	1		42.4
Total n = 255	107	59	5	121	134	38			49	160	46			229	26	106	52	67		35	57.8637	115.763	7			19	726.884	3
																													TOTAL	17862.5
					Mean	41.4902																							AVERAGE	510.357
					Median	38																							MEDIAN	504.03
					Mode	32
					STD	15.4022

## Sheet: CTAS
	Pre	Post
CTAS 1	0	0
CTAS 2	82	61
CTAS 3	169	123
CTAS 4	81	57
CTAS 5	19	7
Total	351	248
Total n	357	255	(some not recorded)

## Sheet: CPC
	PRE	POST
Total visits (n)	357	255
Upper extremity injury (UEI)	16	7
Upper extremity pain (UEP)	10	10
Shortness of breath (SOB)	15	13
Hemoptysis (HEM)	1	0
Abdominal pain (AP)	68	31
Chest pain – non cardiac (CP – NC)	7	2
Fever (F)	7	4
Chest pain (CP)	18	24
Lower extremity pain (LEP)	25	11
Laceration/puncture (LAC)	10	5
Head injury (HI)	3	2
Pregnancy issues <20 wks (PREG)	2	3
Headache (HA)	13	10
?SAH (?SAH)	1	0
Rectal/perineal pain (RPP)	1	2
Nausea and/or vomiting (NV)	9	5
Dizziness/vertigo (DV)	7	3
Hypertension (HTN)	11	2
Altered LOC (ALOC)	4	1
Neurologic changes (NC)	1	0
Post-operative complications (POC)	4	2
Symptoms of CVA (sCVA)	3	0
Flank pain (FP)	7	12
Rash (R)	2	3
Seizure (SZ)	4	0
Burn (BR)	1	0
Lower extremity injury (LEI)	17	10
Follow-up visit (FU)	15	10
Back pain (BP)	12	15
Syncope/pre-syncope (SYN)	3	0
Palpitations (PAL)	2	5
Hiccoughs (HIC)	1	0
General weakness (GW)	9	5
Abnormal lab values (LAB)	3	1
Hyperglycemia (GLUC)	1	0
Major trauma, penetrating (pTRA)	1	0
Lumps, bumps, and calluses (LBC)	1	2
Constipation (CONS)	2	0
Dysphagia (DPG)	2	0
Frostbite/cold injury (COLD)	1	0
Eye pain (EP)	3	2
Localized swelling/redness (RED)	4	1
Cough (COU)	4	5
Neck swelling/pain (NECK)	1	5
Recurrent PTX (rPTX)	1	0
Menstrual problems (MENS)	1	0
Vaginal bleed (vBLD)	2	2
Allergic reaction (ALL)	1	0
Epistaxis (EPI)	1	0
Isolated abdominal trauma (aTRA)	1	0
Earache (EAR)	2	0
Fever – oncology (FO)	1	0
Prescription/medication request (RX)	1	0
Sore throat (SRT)	4	6
Vaginal pain/dyspareunia (VPN)	1	0
Diarrhea (DIA)	1	2
Hyperventilation (hVENT)	1	0
Pruritus (PRU)	1	0
Dental/gum problem (DENT)	2	2
Direct referral (DIR)	1	2
Pain (PAIN)	1	2
Substance misuse/intoxication (TOX)	1	0
Abdominal mass/distention (DIST)	2	0
Groin pain/mass (GRO)	0	2
Itchy/red eye (REY)	0	2
Abrasion (ABR)	0	1
Sensory loss/parasthesias (SENS)	0	1
Minor complaints (MIN)	0	1
Facial trauma (fTRA)	0	1
Visual disturbance (VIS)	0	2
Joints swelling (JTS)	0	1
Suicidal (SUI)	0	2
Paranoid behavior (PAB)	0	1
Anxiety (ANX)	0	1
Eye discharge (EDC)	0	1
Foreign body, skin (FBS)	0	1
Testicular/scrotal pain (TEST)	0	5
Medical device problem (DEV)	1	1
Eye foreign body (EFB)	0	1
Penile swelling (PEN)	0	1
Eye trauma (eTRA)	0	1
Total	359	255

## Sheet: Dx - Pre
Discharge Dx Category (PRE)
ABDO PAIN NYD
ABDO PAIN NYD
ABDO PAIN NYD
ABDO PAIN NYD
ABDO PAIN NYD
ABDO PAIN NYD
ABDO PAIN NYD
ABDO PAIN NYD
ABDO PAIN NYD
ABDO PAIN NYD
ABDO PAIN NYD
ABDO PAIN NYD
ABDO PAIN NYD
ABDO PAIN NYD
ABDO PAIN NYD
ABDO PAIN NYD
ABDO PAIN NYD
ABDO PAIN NYD
ABDO PAIN NYD
ABDO PAIN NYD
ABDO PAIN NYD		21
ABDO PAIN NYD - Chronic
ABDO PAIN NYD - Chronic
ABDO PAIN NYD - Chronic
ABDO PAIN NYD - Chronic
ABDO PAIN NYD - Chronic		5
ALL - Minor
ALL - Minor		2
BACK PAIN - Mechanical
BACK PAIN - Mechanical
BACK PAIN - Mechanical
BACK PAIN - Mechanical
BACK PAIN - Mechanical
BACK PAIN - Mechanical		6
CARDIO - Acute - ACS
CARDIO - Acute - ACS
CARDIO - Acute - ACS		3
CARDIO - Acute - Infxn
CARDIO - Acute - Infxn		2
CARDIO - Acute - Palp
CARDIO - Acute - Palp		2
CONFUSION NYD
CONFUSION NYD		2
CP NYD
CP NYD
CP NYD
CP NYD
CP NYD
CP NYD
CP NYD
CP NYD
CP NYD
CP NYD
CP NYD
CP NYD
CP NYD
CP NYD
CP NYD
CP NYD
CP NYD
CP NYD		18
Dehydration		1
DENT - Infxn		1
DERM - Minor
DERM - Minor		2
ENDO - Acute
ENDO - Acute
ENDO - Acute		3
ENDO - Chronic		1
ENT - Epistaxis		1
ENT - Infxn - Minor
ENT - Infxn - Minor
ENT - Infxn - Minor
ENT - Infxn - Minor		4
ENVIRO - Major		1
EYE - Chronic
EYE - Chronic		2
GI - Major - Appendicitis
GI - Major - Appendicitis		2
GI - Major - Cholecystitis
GI - Major - Cholecystitis
GI - Major - Cholecystitis
GI - Major - Cholecystitis		4
GI - Major - Esophageal stricture		1
GI - Major - Pancreatitis
GI - Major - Pancreatitis		2
GI - Major - SBO
GI - Major - SBO		2
GI - Major - Splenomegaly		1
GI - Minor - Biliary Colic
GI - Minor - Biliary Colic		2
GI - Minor - Constipation
GI - Minor - Constipation
GI - Minor - Constipation
GI - Minor - Constipation
GI - Minor - Constipation
GI - Minor - Constipation
GI - Minor - Constipation		7
GI - Minor - Diverticulitis
GI - Minor - Diverticulitis		2
GI - Minor - Gastro
GI - Minor - Gastro
GI - Minor - Gastro
GI - Minor - Gastro
GI - Minor - Gastro
GI - Minor - Gastro		6
GI - Minor - GERD
GI - Minor - GERD
GI - Minor - GERD
GI - Minor - GERD
GI - Minor - GERD
GI - Minor - GERD		6
GI - Minor - Hernia
GI - Minor - Hernia		2
GU - Acute - UTI
GU - Acute - UTI		2
GU - Chronic - Obstr UVJ		1
GYNE - Acute - Bleed
GYNE - Acute - Bleed		2
GYNE - Acute - Cyst
GYNE - Acute - Cyst		2
GYNE - Acute - Dysmenorrhea		1
GYNE - Acute - Infectious		1
GYNE - Chronic - DUB		1
GYNE - Chronic - Fibroids
GYNE - Chronic - Fibroids
GYNE - Chronic - Fibroids
GYNE - Chronic - Fibroids
GYNE - Chronic - Fibroids
GYNE - Chronic - Fibroids		6
HA - Benign
HA - Benign
HA - Benign
HA - Benign
HA - Benign
HA - Benign
HA - Benign
HA - Benign
HA - Benign
HA - Benign
HA - Benign
HA - Benign
HA - Benign
HA - Benign		14
HIV Related
HIV Related		2
HTN - Acute
HTN - Acute
HTN - Acute		3
HTN - Chronic
HTN - Chronic
HTN - Chronic
HTN - Chronic
HTN - Chronic
HTN - Chronic		6
LRT - Acute - Asthma
LRT - Acute - Asthma		2
LRT - Acute - Bronchitis
LRT - Acute - Bronchitis
LRT - Acute - Bronchitis
LRT - Acute - Bronchitis		4
LRT - Acute - PNA
LRT - Acute - PNA
LRT - Acute - PNA
LRT - Acute - PNA
LRT - Acute - PNA
LRT - Acute - PNA
LRT - Acute - PNA
LRT - Acute - PNA
LRT - Acute - PNA
LRT - Acute - PNA
LRT - Acute - PNA		11
LRT - Acute - PTX
LRT - Acute - PTX
LRT - Acute - PTX		3
LRT - Acute - TB		1
LRT - Chronic - CF		1
LWBS		1
Medical device		1
METABOLIC - HyperK		1
Minor NOS
Minor NOS
Minor NOS
Minor NOS
Minor NOS
Minor NOS
Minor NOS		7
MSK - # - Extremity
MSK - # - Extremity
MSK - # - Extremity
MSK - # - Extremity
MSK - # - Extremity
MSK - # - Extremity
MSK - # - Extremity
MSK - # - Extremity
MSK - # - Extremity
MSK - # - Extremity
MSK - # - Extremity
MSK - # - Extremity
MSK - # - Extremity
MSK - # - Extremity		14
MSK - # - Spine
MSK - # - Spine		2
MSK - Dislocation		1
MSK - Rhabdo	*relabeled metabolic - rhabdo	1
MSK - STI
MSK - STI
MSK - STI
MSK - STI
MSK - STI
MSK - STI
MSK - STI
MSK - STI
MSK - STI
MSK - STI
MSK - STI
MSK - STI
MSK - STI
MSK - STI
MSK - STI
MSK - STI
MSK - STI
MSK - STI
MSK - STI
MSK - STI
MSK - STI
MSK - STI
MSK - STI
MSK - STI
MSK - STI
MSK - STI
MSK - STI
MSK - STI
MSK - STI
MSK - STI
MSK - STI
MSK - STI
MSK - STI
MSK - STI
MSK - STI
MSK - STI
MSK - STI
MSK - STI
MSK - STI
MSK - STI
MSK - STI
MSK - STI
MSK - STI
MSK - STI
MSK - STI		45
NEURO - Acute - CVA		1
NEURO - Acute - Minor
NEURO - Acute - Minor
NEURO - Acute - Minor		3
NEURO - Acute - Sz
NEURO - Acute - Sz
NEURO - Acute - Sz		3
NEURO - Acute - TIA		1
NV - NYD	*relabeled gastro	1
OBS - Abortion
OBS - Abortion		2
OBS - Labour		1
OBS - Postpartum - Minor		1
OBS - Pregnancy
OBS - Pregnancy		2
ONC - New dx		1
ONC - Chemo related		1
ONC - Fever		1
ONC - New dx
ONC - New dx
ONC - New dx		3
PAIN - Neuropathic
PAIN - Neuropathic
PAIN - Neuropathic
PAIN - Neuropathic
PAIN - Neuropathic		5
PAIN NYD - Acute
PAIN NYD - Acute
PAIN NYD - Acute
PAIN NYD - Acute
PAIN NYD - Acute
PAIN NYD - Acute
PAIN NYD - Acute		7
PAIN NYD - Chronic
PAIN NYD - Chronic
PAIN NYD - Chronic
PAIN NYD - Chronic		4
PSYCH - Minor - Anxiety
PSYCH - Minor - Anxiety		2
RENAL - Acute - Colic
RENAL - Acute - Colic
RENAL - Acute - Colic
RENAL - Acute - Colic
RENAL - Acute - Colic
RENAL - Acute - Colic
RENAL - Acute - Colic
RENAL - Acute - Colic		8
RENAL - Acute - Infxn		1
RENAL - Chronic - CKD		1
RHEUM - Acute - Major - GCA		1
RX Refill		1
SEPSIS
SEPSIS
SEPSIS		3
SOFT TISSUE - Infxn - Major
SOFT TISSUE - Infxn - Major		2
SOFT TISSUE - Infxn - Minor
SOFT TISSUE - Infxn - Minor
SOFT TISSUE - Infxn - Minor
SOFT TISSUE - Infxn - Minor
SOFT TISSUE - Infxn - Minor
SOFT TISSUE - Infxn - Minor
SOFT TISSUE - Infxn - Minor		7
SYNCOPE - Benign
SYNCOPE - Benign
SYNCOPE - Benign		3
THROMBOSIS - DVT		1
TOX - Minor		1
TRAUMA - Blunt - Major
TRAUMA - Blunt - Major		2
TRAUMA - Burn - Minor		1
TRAUMA - Head - Minor
TRAUMA - Head - Minor
TRAUMA - Head - Minor
TRAUMA - Head - Minor		4
TRAUMA - Lac
TRAUMA - Lac
TRAUMA - Lac
TRAUMA - Lac
TRAUMA - Lac
TRAUMA - Lac
TRAUMA - Lac
TRAUMA - Lac
TRAUMA - Lac
TRAUMA - Lac
TRAUMA - Lac
TRAUMA - Lac
TRAUMA - Lac		13
TRAUMA - Penetrating - Major		1
URT - Acute - Major		1
URT - Acute - Minor
URT - Acute - Minor
URT - Acute - Minor
URT - Acute - Minor
URT - Acute - Minor
URT - Acute - Minor
URT - Acute - Minor
URT - Acute - Minor
URT - Acute - Minor
URT - Acute - Minor		10
Vertigo - NYD
Vertigo - NYD		2
Vertigo - Peripheral
Vertigo - Peripheral		2
WEAKNESS NYD
WEAKNESS NYD
WEAKNESS NYD		3
TOTAL		357

## Sheet: Dx - Post
Discharge Dx Category (POST)
ABDO PAIN NYD - Chronic	*see below	1
ABDO PAIN NYD
ABDO PAIN NYD
ABDO PAIN NYD
ABDO PAIN NYD
ABDO PAIN NYD
ABDO PAIN NYD
ABDO PAIN NYD
ABDO PAIN NYD
ABDO PAIN NYD
ABDO PAIN NYD		10
ABDO PAIN NYD - Chronic		1
ALL - Minor		1
BACK PAIN - Mechanical
BACK PAIN - Mechanical
BACK PAIN - Mechanical
BACK PAIN - Mechanical
BACK PAIN - Mechanical
BACK PAIN - Mechanical
BACK PAIN - Mechanical
BACK PAIN - Mechanical
BACK PAIN - Mechanical
BACK PAIN - Mechanical
BACK PAIN - Mechanical
BACK PAIN - Mechanical
BACK PAIN - Mechanical
BACK PAIN - Mechanical
BACK PAIN - Mechanical
BACK PAIN - Mechanical		16
CARDIO - Acute - ACS
CARDIO - Acute - ACS
CARDIO - Acute - ACS		3
CARDIO - Acute - Arrhythmia
CARDIO - Acute - Arrhythmia		2
CARDIO - Acute - CHF
CARDIO - Acute - CHF
CARDIO - Acute - CHF		3
CARDIO - Acute - Palp		1
CARDIO - Acute - Pericarditis		1
CP NYD
CP NYD
CP NYD
CP NYD
CP NYD
CP NYD
CP NYD
CP NYD
CP NYD
CP NYD
CP NYD
CP NYD
CP NYD
CP NYD
CP NYD
CP NYD
CP NYD
CP NYD
CP NYD
CP NYD
CP NYD
CP NYD
CP NYD
CP NYD
CP NYD		25
DENT - Infxn		1
DERM - Minor		1
ENT - Infxn - Minor
ENT - Infxn - Minor		2
ENT - Mass - Minor
ENT - Mass - Minor		2
ENT - Oral - Minor		1
ENVIRO - Minor		1
EYE - Acute - Infn
EYE - Acute - Infn		2
EYE - Acute - Trauma		1
EYE - Acute - Vision change		1
EYE - Chronic		1
Fever		1
GI - Major - Appendicitis
GI - Major - Appendicitis
GI - Major - Appendicitis
GI - Major - Appendicitis		4
GI - Major - Cholangitis		1
GI - Major - IBD		1
GI - Major - Incarcerated hernia
GI - Major - Incarcerated hernia		2
GI - Major - Pancreatitis
GI - Major - Pancreatitis		2
GI - Minor - Constipation
GI - Minor - Constipation		2
GI - Minor - Gastro
GI - Minor - Gastro
GI - Minor - Gastro
GI - Minor - Gastro
GI - Minor - Gastro
GI - Minor - Gastro
GI - Minor - Gastro		7
GI - Minor - GERD
GI - Minor - GERD
GI - Minor - GERD		3
GI - Minor - Hemorrhoids		1
GI - Minor - Hernia		1
GU - Acute - Balanitis		1
GU - Acute - Epididymitis
GU - Acute - Epididymitis
GU - Acute - Epididymitis
GU - Acute - Epididymitis		4
GU - Acute - Hydrocele		1
GU - Acute - UTI
GU - Acute - UTI		2
GU - Chronic - Prostatitis		1
GYNE - Acute - Bleed
GYNE - Acute - Bleed		2
GYNE - Acute - Cyst		1
GYNE - Acute - Infectious
GYNE - Acute - Infectious
GYNE - Acute - Infectious		3
HA - Benign
HA - Benign
HA - Benign
HA - Benign
HA - Benign
HA - Benign		6
HTN - Chronic		1
LRT - Acute - Asthma
LRT - Acute - Asthma
LRT - Acute - Asthma
LRT - Acute - Asthma		4
LRT - Acute - Bronchitis		1
LRT - Acute - COPDE		1
LRT - Acute - PNA
LRT - Acute - PNA
LRT - Acute - PNA
LRT - Acute - PNA
LRT - Acute - PNA		5
Medical device		1
Minor NOS
Minor NOS
Minor NOS
Minor NOS		4
MSK - # - Extremity
MSK - # - Extremity
MSK - # - Extremity
MSK - # - Extremity
MSK - # - Extremity
MSK - # - Extremity		6
MSK - # - Pelvis
MSK - # - Pelvis		2
MSK - Dislocation		1
MSK - STI
MSK - STI
MSK - STI
MSK - STI
MSK - STI
MSK - STI
MSK - STI
MSK - STI
MSK - STI
MSK - STI
MSK - STI
MSK - STI
MSK - STI
MSK - STI
MSK - STI
MSK - STI
MSK - STI
MSK - STI
MSK - STI		19
NEURO - Acute - CVA
NEURO - Acute - CVA		2
OBS - Abortion		1
OBS - Ectopic
OBS - Ectopic
OBS - Ectopic		3
OBS - Pregnancy		1
OBS - Pregnancy NV
OBS - Pregnancy NV		2
ONC - Chemo related		1
ONC - New dx
ONC - New dx		2
ONC - Pain		1
PAIN - Neuropathic
PAIN - Neuropathic
PAIN - Neuropathic		3
PAIN NYD - Acute
PAIN NYD - Acute
PAIN NYD - Acute
PAIN NYD - Acute
PAIN NYD - Acute
PAIN NYD - Acute
PAIN NYD - Acute		7
POSTOP - Complications		1
PSYCH - Major - Psychosis		1
PSYCH - Major - Suicidal		1
PSYCH - Minor - Anxiety
PSYCH - Minor - Anxiety
PSYCH - Minor - Anxiety
PSYCH - Minor - Anxiety
PSYCH - Minor - Anxiety		5
PSYCH - Minor - Insomnia		1
PSYCH - Minor - Pseudoseizure		1
PSYCH - Minor - PTSD		1
RENAL - Acute - Colic
RENAL - Acute - Colic
RENAL - Acute - Colic
RENAL - Acute - Colic
RENAL - Acute - Colic
RENAL - Acute - Colic
RENAL - Acute - Colic
RENAL - Acute - Colic
RENAL - Acute - Colic
RENAL - Acute - Colic		10
RENAL - Acute - Infxn		1
RENAL - Chronic - CKD
RENAL - Chronic - CKD		2
RX Refill		1
SEPSIS		1
SOB NYD	*relabel to LRT - Acute - SOB	1
Social concerns		1
SOFT TISSUE - Infxn - Minor
SOFT TISSUE - Infxn - Minor
SOFT TISSUE - Infxn - Minor
SOFT TISSUE - Infxn - Minor
SOFT TISSUE - Infxn - Minor
SOFT TISSUE - Infxn - Minor
SOFT TISSUE - Infxn - Minor
SOFT TISSUE - Infxn - Minor
SOFT TISSUE - Infxn - Minor
SOFT TISSUE - Infxn - Minor
SOFT TISSUE - Infxn - Minor		11
SOFT TISSUE - Mass		1
SYNCOPE - Benign		1
THROMBOSIS - DVT		1
TOX - Major		1
TRAUMA - Blunt - Minor		1
TRAUMA - Head - Minor
TRAUMA - Head - Minor		2
TRAUMA - Lac
TRAUMA - Lac
TRAUMA - Lac
TRAUMA - Lac
TRAUMA - Lac
TRAUMA - Lac
TRAUMA - Lac		7
URT - Acute - Minor
URT - Acute - Minor
URT - Acute - Minor
URT - Acute - Minor
URT - Acute - Minor
URT - Acute - Minor
URT - Acute - Minor
URT - Acute - Minor
URT - Acute - Minor
URT - Acute - Minor
URT - Acute - Minor		11
Total		255

## Sheet: GRAPH DATA
	Pre	Post
Not recorded	1.7	2.7
1	0	0
2	23	23.9
3	47.3	48.2
4	22.7	22.4
5	5.3	2.7
